# Supplementary material
Source: PubMed Central journal article supplement (PMC6479027)

## Supplementary Figure legends

Supplemental Figure 1. Cytokine production in response to *S. aureus* skin infection. Multiplex cytokine analysis was performed on clarified material from homogenized skin biopsies. Mice, control and hyperglycemic (STZ-treated) were infected with  $2 \times 10^6$  cfu of *S. aureus* for 1 or 5 days. N=3 for PBS uninfected mice, 8 for 1 day infected mice and 12 per group in the 5 day infected. \*P<0.05 relative to WT infected.

Supplemental Figure 2. Additional cytokine production in response to *S. aureus* skin infection. Multiplex cytokine analysis was performed on clarified material from homogenized skin biopsies. Mice, control and hyperglycemic (STZ-treated) were infected with  $4 \times 10^6$  cfu of *S. aureus* for 1 or 5 days. N=3 for PBS uninfected mice, 8 for 1 day infected mice and 12 per group in the 6 day infected. \*P<0.05 relative to WT infected.

Supplemental Figure 3. Influence of glucose on macrophage function. Macrophages were grown in the presence of varying concentrations of glucose for 2 days. A) Intracellular killing over increasing concentrations of glucose. N=9. B) Viability of cells from A). N=6. C) Influence of galactose on intracellular bacteria numbers. N=6. D) Intracellular killing in high glucose with increasing concentrations of 2DG. N=5. E) Cell viability from D) N=10. F) Ability of macrophages grown in varying glucose levels to phagocytose *S. aureus*. N=15. G) Phagocytosis of *S. aureus* under different concentrations of glucose and 2DG. N=9. \*\*\*\*P<0.0001, \*\*\*P<0.001, \*\*P<0.01 and \*P<0.05.

Supplemental Figure 4. Effect of glucose exposure on macrophage reactive oxygen species production. Macrophages were grown in normal and high glucose for 2 days before exposure to *S. aureus* and levels of A) cellular ROS and B) mitochondrial ROS were measured. Each dot represents a biological replicate. Influence of hydrogen peroxide on C) cellular ROS production (N=2) and D) intracellular bacterial killing. N=4. E) Intracellular bacterial killing with superoxide dismutase (*sodA*) and catalase (*katE*) mutants of *S. aureus*. N=3. \*\*\*\*P<0.0001, \*\*\*P<0.001 and \*P<0.05.

Supplemental Figure 5. Effect of glucose on the glycolytic function of macrophages. A) Glycolytic stress test performed on a Seahorse analyzer with macrophages treated under normal or hyperglycemic conditions. N=18. Macrophages were incubated with WT or a *pyk* deficient strain of *S. aureus* and assessed for B) intracellular survival (N=15) and C) ability to be taken up by the cells (N=3).

Supplemental Figure 6. Influence of glucose on human keratinocyte cell function. The human keratinocyte cells, HaCaTs or primary keratinocytes were grown under normal (6 mM) or high (50 mM) glucose conditions for 2 days. A) Intracellular survival of *S. aureus* in a gentamicin protection assay. N=10. B) Survival of *S. aureus* in extracellular milieu. N=14. C). Gentamicin protection again with primary keratinocytes. N=15. D) Uptake of AF647 labelled *S. aureus*. N=2 for PBS and 7 for *S. aureus*. E) Viability of keratinocytes after gentamicin protection assays. N=7.

Supplemental Figure 7. *S. aureus* gene expression after isolation from 1 day skin biopsies in normal or diabetic (STZ treated) mice. Control and STZ mice were subcutaneously infected with  $2 \times 10^6$  cfu of *S. aureus* USA300 for 1 day before RNA isolation from punch biopsies. N=4. \*P<0.05.

Supplemental Figure 8. Functional complementation of *clp* mutants. A) Restoration of protease activity in *clpP* and *clpX* mutants. B) Restoration of growth defect at 43.5°C of *clpC* mutant upon complementation.

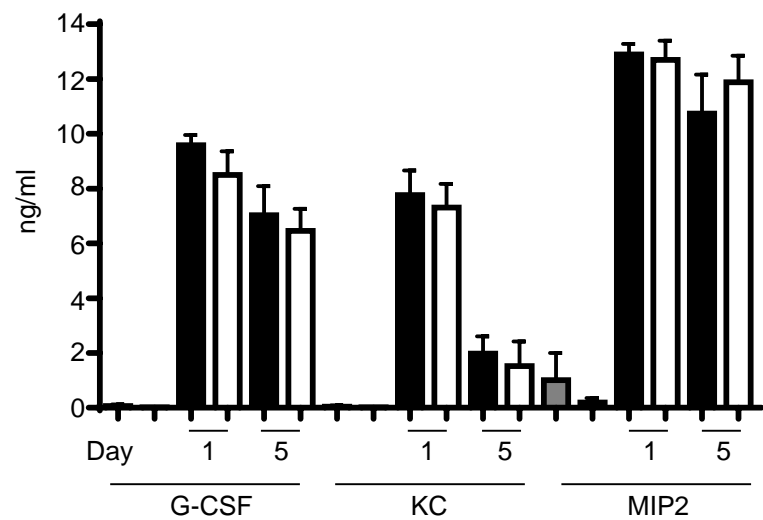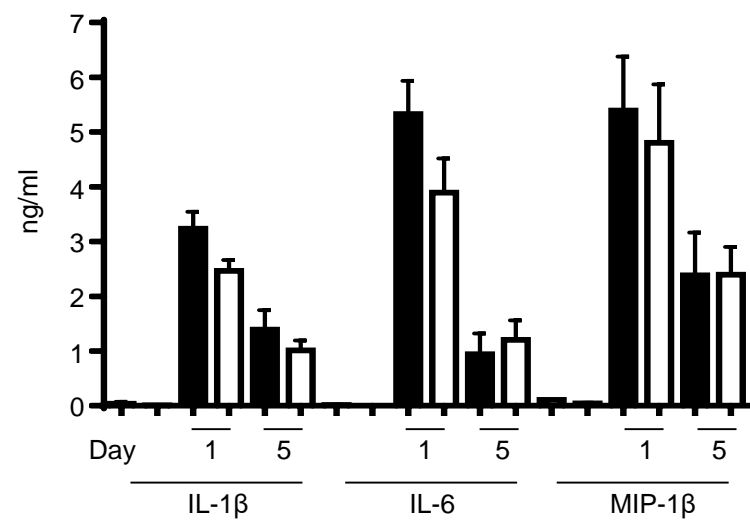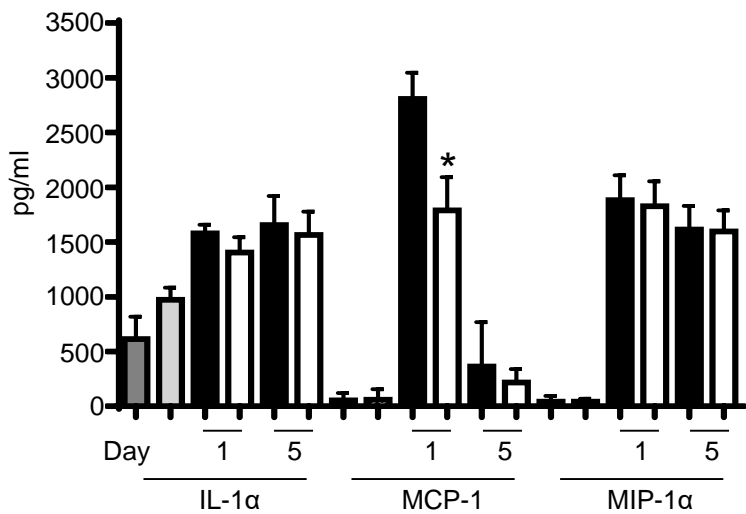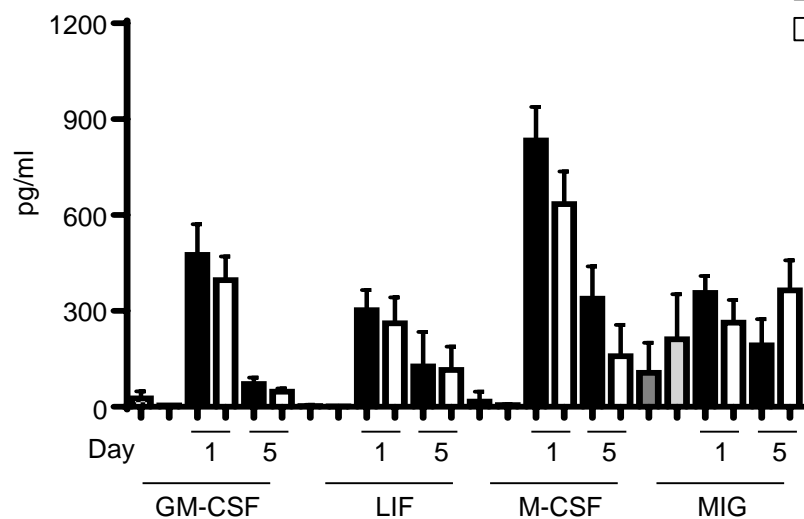

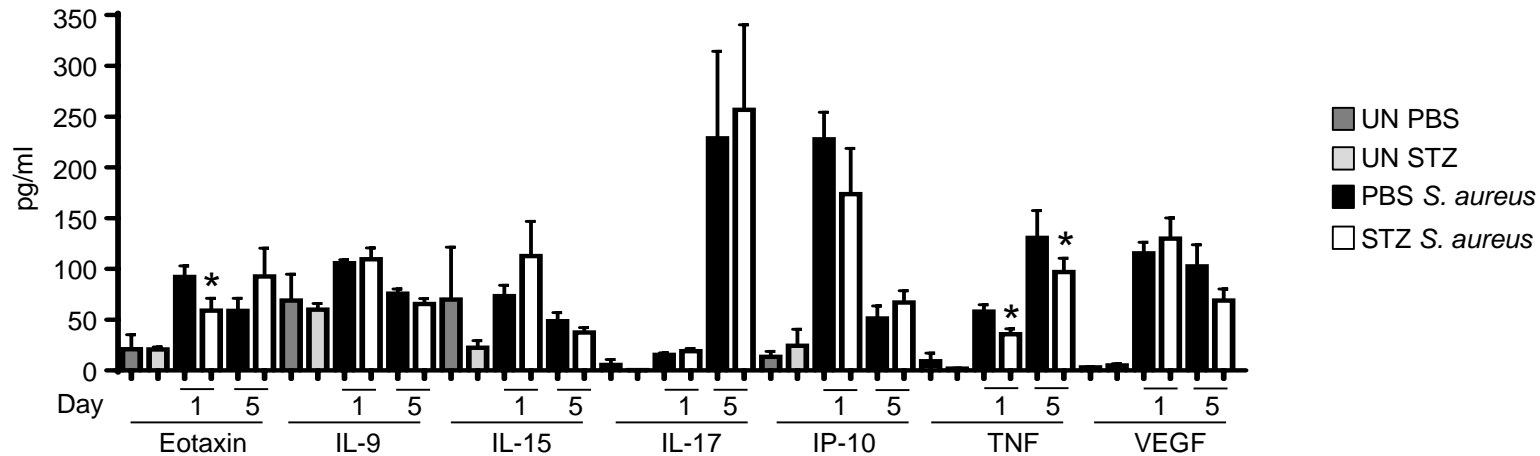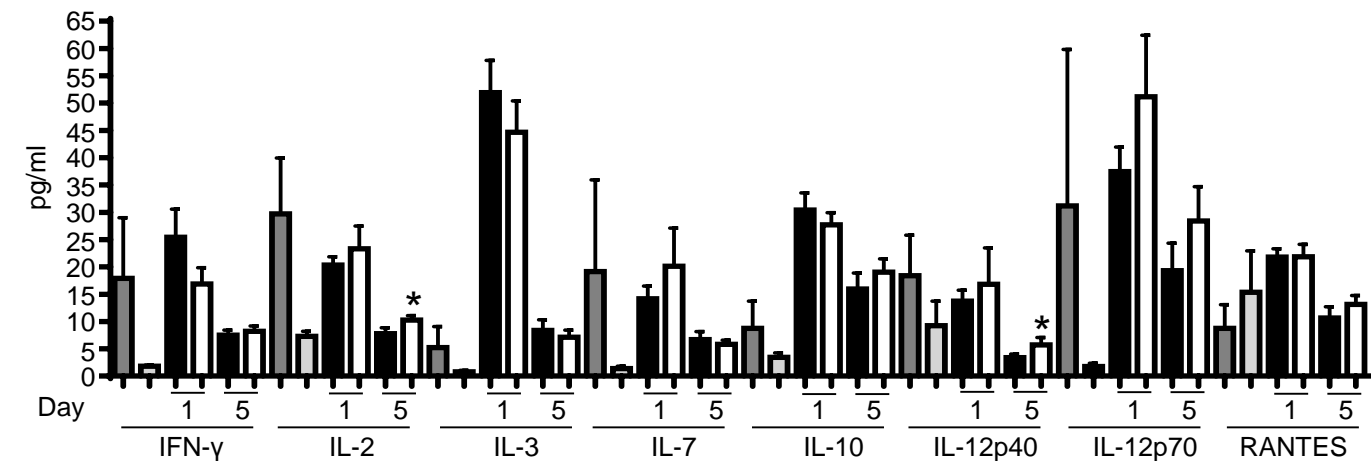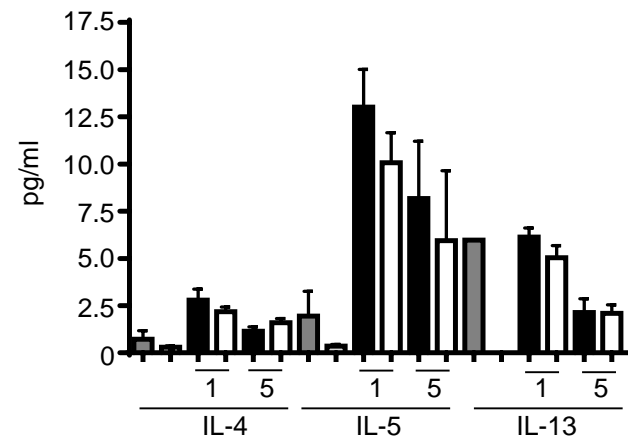

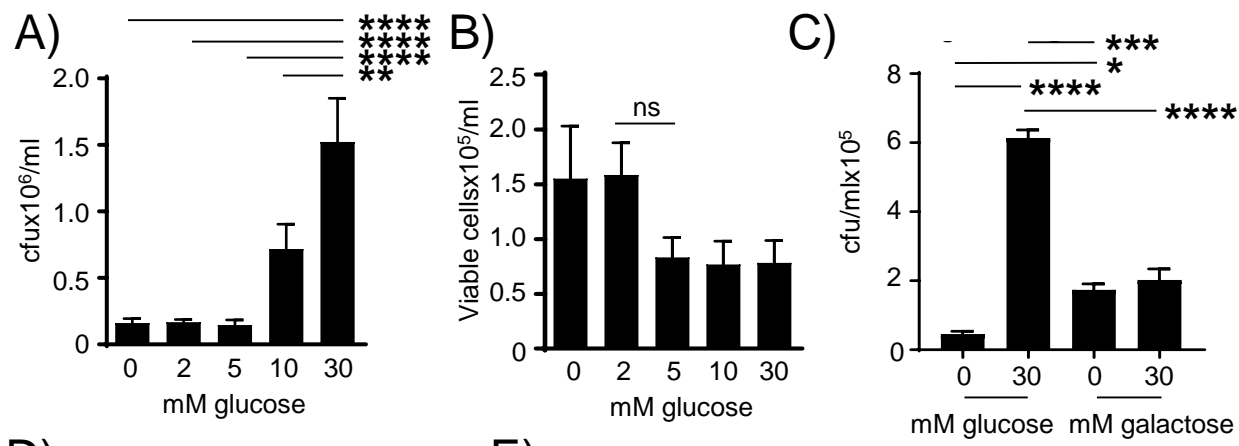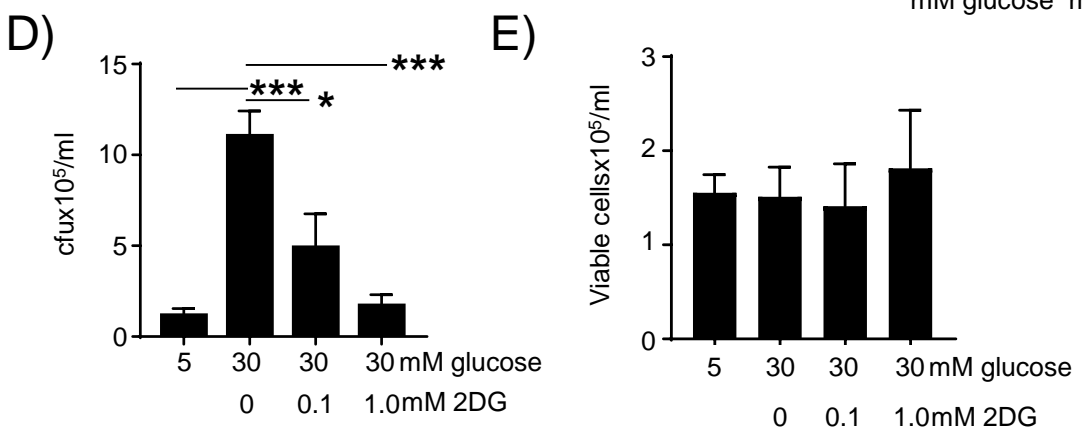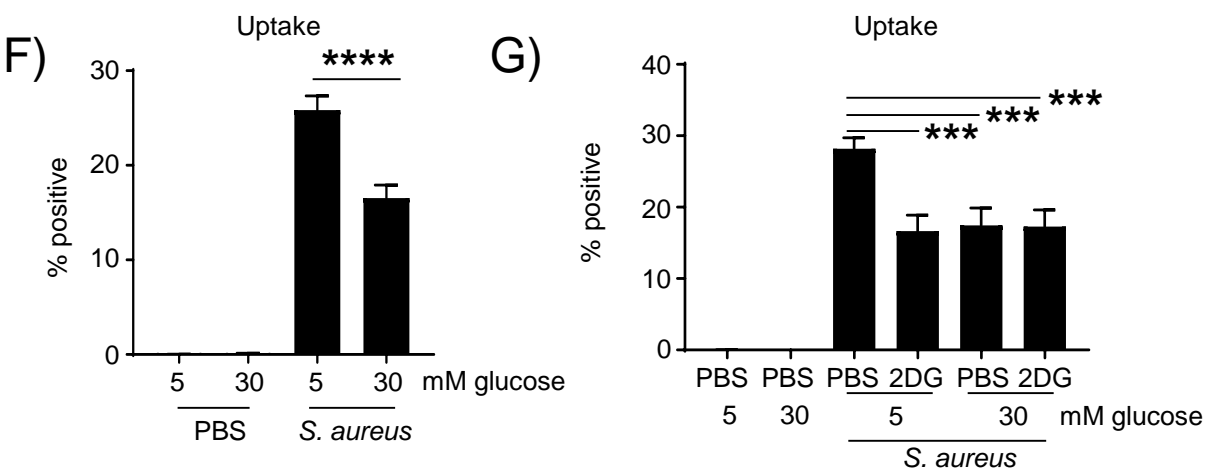

A)

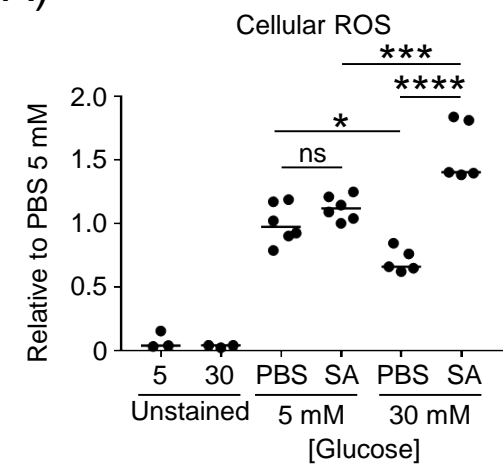

B)

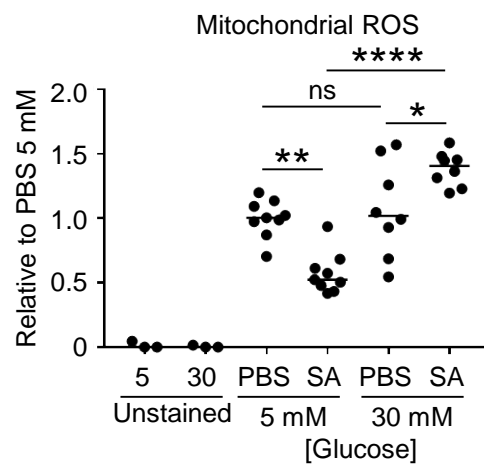

C)

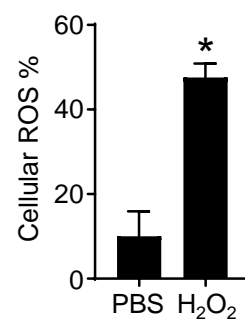

D)

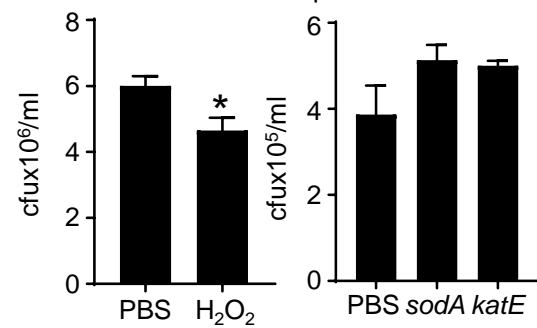

Supp Fig 4

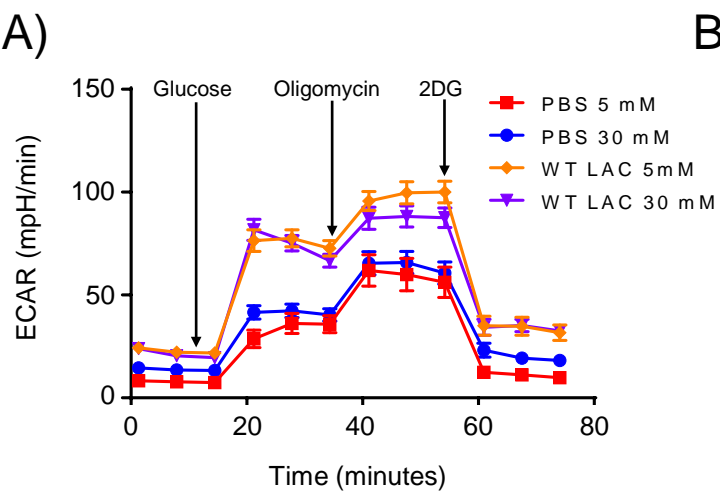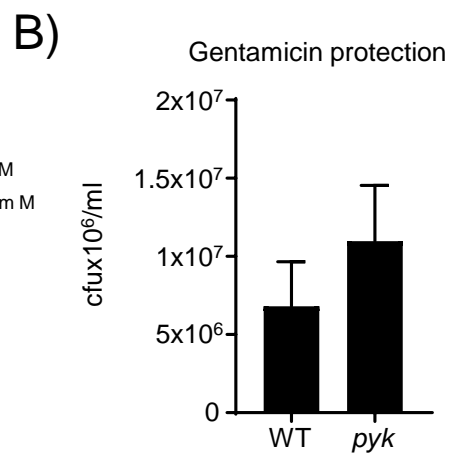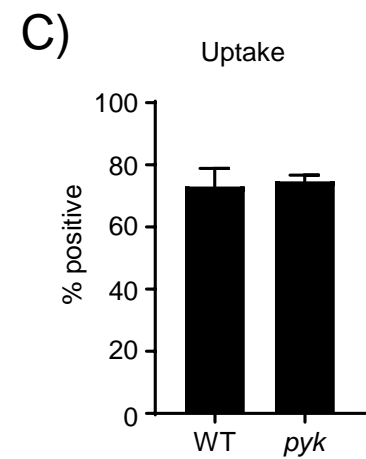



HaCats

Primary keratinocytes

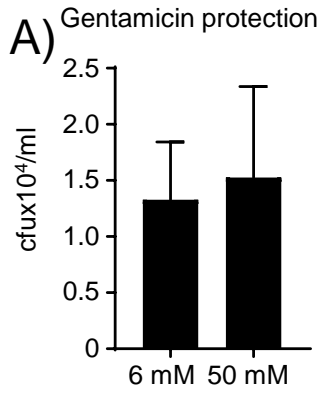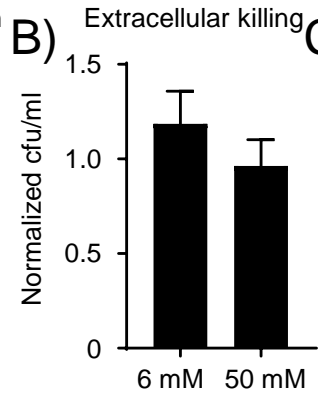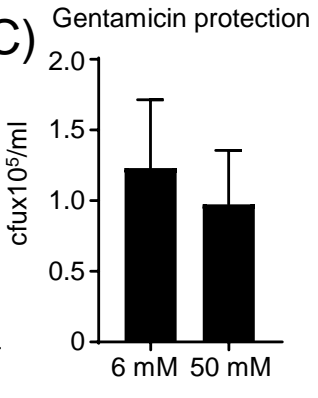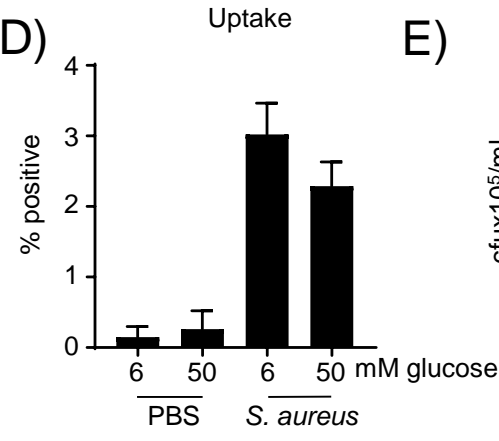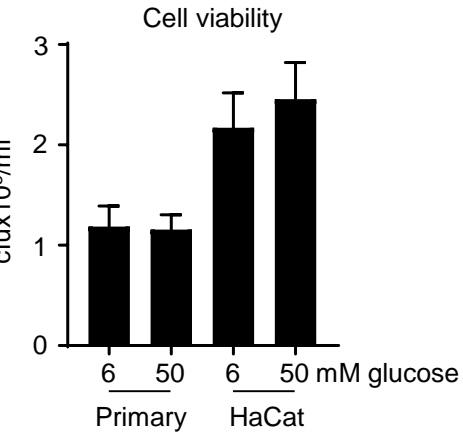

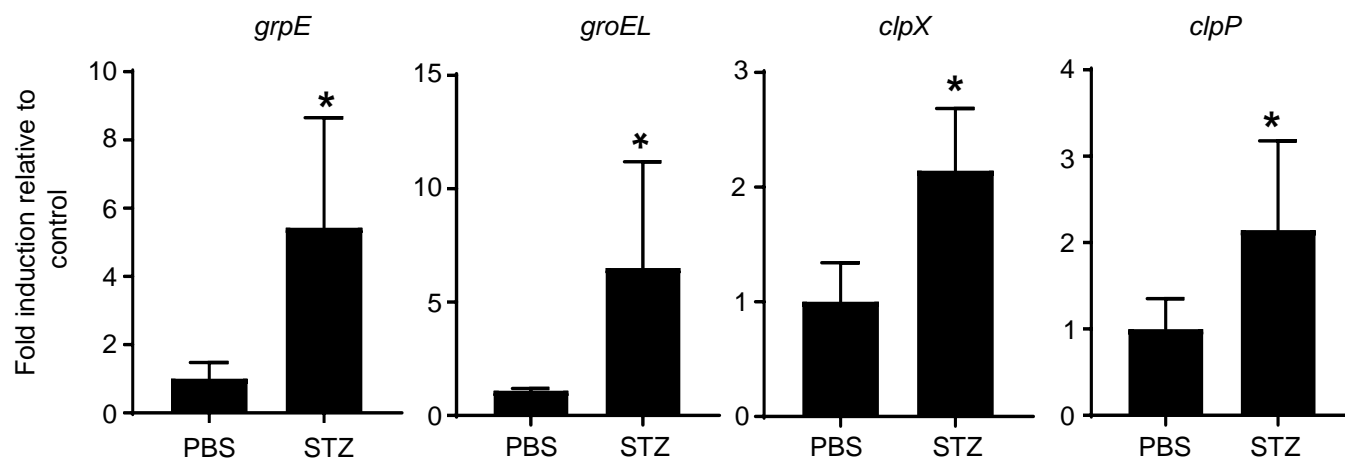

A)

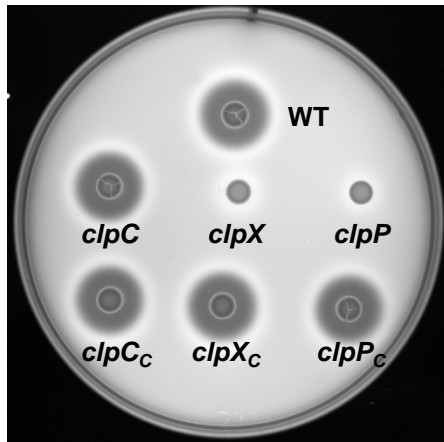

B)

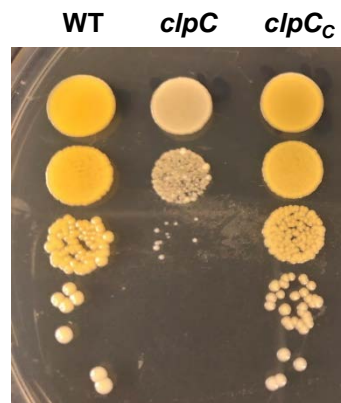

Supplement: IAI.00163-19-s0001.pdf [file IAI.00163-19-s0001.pdf]
